# Supplementary material for: STAT1-induced upregulation of lncRNA KTN1-AS1 predicts poor prognosis and facilitates non-small cell lung cancer progression via miR-23b/DEPDC1 axis
Source: publisher site journal article supplement (doi:10.18632/aging.103191), 2020-05-12
Supplement: Supplementary file [file aging-v12i9-103191-supplementary-material-SD1.pdf]

SUPPLEMENTARY FIGURES

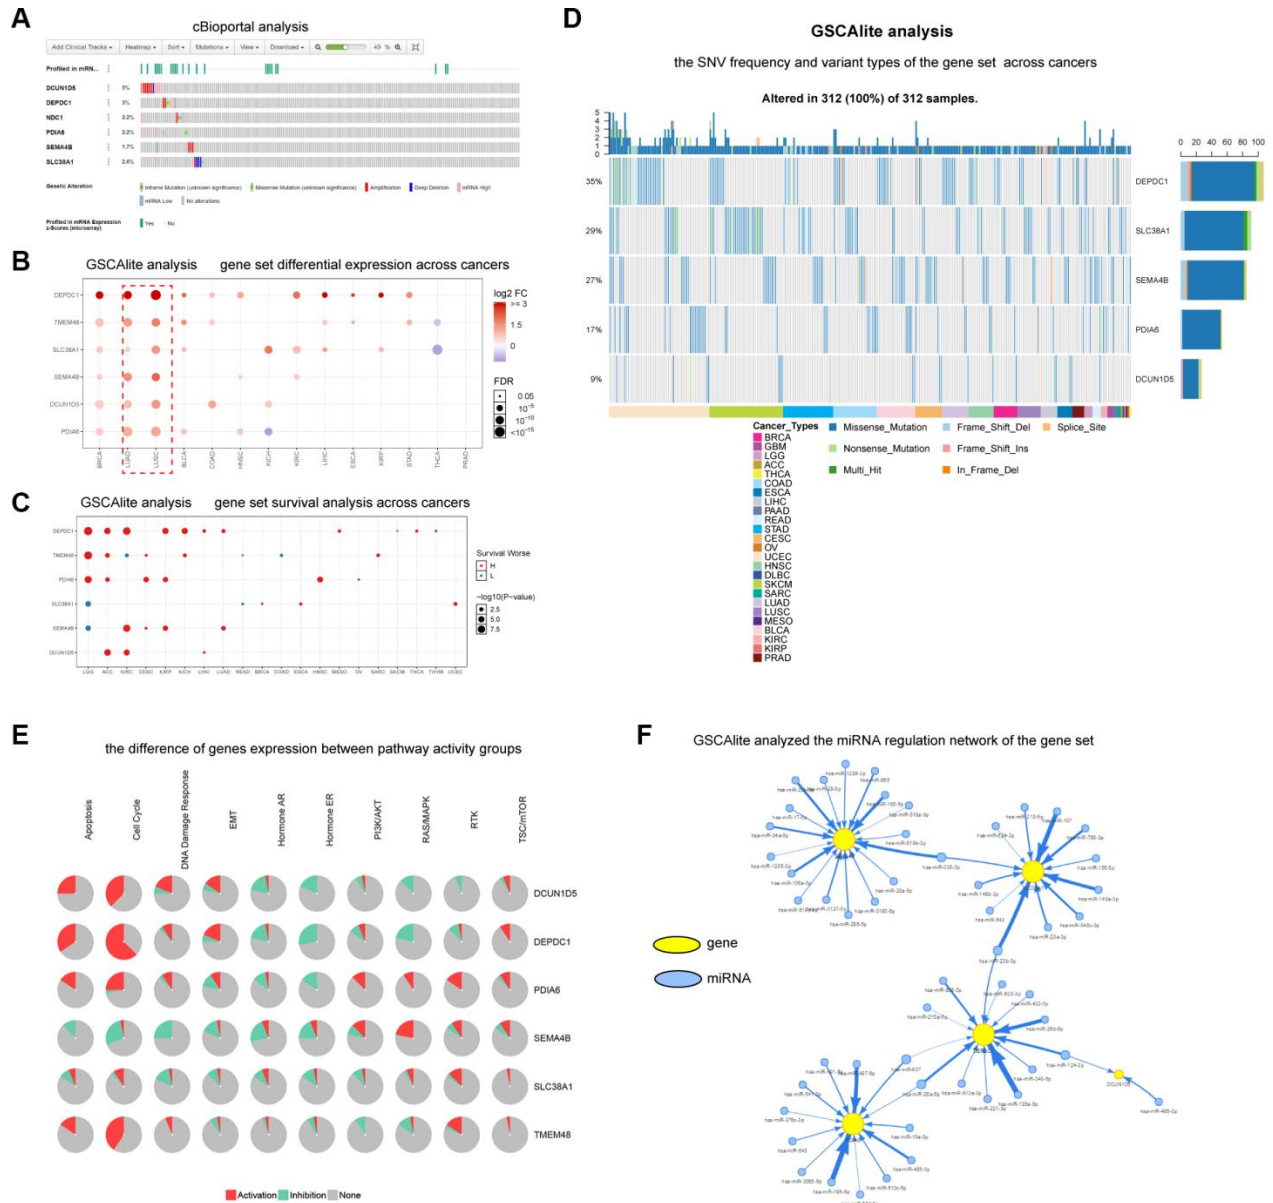

**Supplementary Figure 1.** (A) cBioportal program to analyze the genetic changes of these 6 genes. (B) GSCAlite algorithm analyzed the DEPDC1 expression across diverse cancer types. (C) GSCAlite algorithm analyzed the overall survivals relevant with DEPDC1 across diverse cancer types. (D) The SNV frequency of the 6 genes across cancers was analyzed by GSCAlite algorithm. (E) The pathway activity of the 6 genes was analyzed by GSCAlite algorithm. (F) GSCAlite algorithm was used to analyze the miRNA regulation network of these 6 genes.

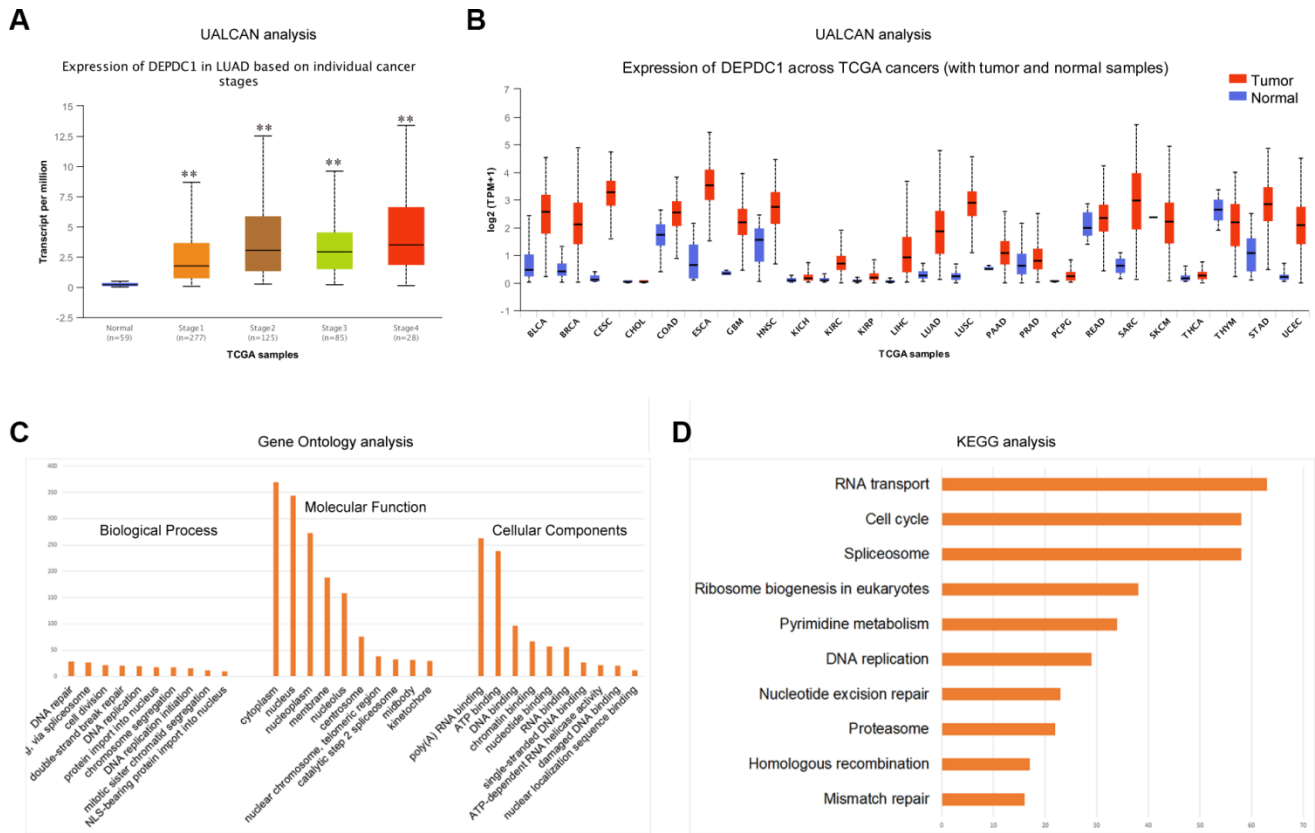

**Supplementary Figure 2.** (A) UALCAN program analyzed the DEPDC1 expression in stages of NSCLC using TCGA data. (B) UALCAN program analyzed the DEPDC1 expression across TCGA cancer types. (C) The genes positively correlated with DEPDC1 in lung cancer were obtained by using UALCAN program analysis, and GO analysis of these genes were conducted. (D) KEGG pathway analysis of the above genes. \* P < 0.05, \*\*P < 0.01.
